## CLINICAL REVIEW

# The Role of Receptor Activator of Nuclear Factor- $\kappa$ B (RANK)/RANK Ligand/Osteoprotegerin: Clinical Implications

Damaris Vega, Naim M. Maalouf, and Khashayar Sakhaee

Department of Internal Medicine and Charles and Jane Pak Center for Mineral Metabolism and Clinical Research, University of Texas Southwestern Medical Center, Dallas, Texas 75390

**Context:** Receptor activator of nuclear factor- $\kappa$ B ligand (RANKL), receptor activator of nuclear factor- $\kappa$ B (RANK), and osteoprotegerin (OPG) play a central role in bone remodeling and disorders of mineral metabolism.

**Evidence Acquisition:** A PubMed search was conducted from January 1992 until 2007 for basic, observational, and clinical studies in subjects with disorders related to imbalances in the RANK/RANKL/OPG system.

**Evidence Synthesis:** RANK, RANKL, and OPG are members of the TNF receptor superfamily. The pathways involving them in conjunction with various cytokines and calcitropic hormones play a pivotal role in bone remodeling. Several studies involving mutations in the genes encoding RANK and OPG concluded in the discovery of a number of inherited skeletal disorders. In addition, basic and clinical studies established a consistent relationship between the RANK/

RANKL/OPG pathway and skeletal lesions related to disorders of mineral metabolism. These studies were a stepping stone in further defining the role of the RANK/RANKL/OPG pathway in osteoporosis, rheumatoid arthritis, bone loss associated with malignancy-related skeletal diseases, and its relationship to vascular calcifications. Subsequently, the further understanding of this pathway led to the development of new therapeutic modalities including the human monoclonal antibody to RANKL and recombinant OPG as a target for treatment of postmenopausal osteoporosis and multiple myeloma.

**Conclusions:** The RANK/RANKL/OPG system mediates the effects of calcitropic hormones and, consequently, alterations in their ratio are key in the development of several clinical conditions. New agents with the potential to block effects of RANKL have emerged for treatment of postmenopausal osteoporosis and malignancy-related skeletal disease. (*J Clin Endocrinol Metab* 92: 4514–4521, 2007)

DISCOVERY OF THE receptor activator of nuclear factor- $\kappa$ B (RANK)/RANK ligand (RANKL)/osteoprotegerin (OPG) system as a key mediator of bone remodeling has been invaluable to our basic understanding of this process and has bridged basic research to the treatment of multiple clinical conditions. Dysregulation of the RANK/RANKL/OPG system has been implicated in the pathophysiology of multiple bone remodeling disorders including osteoporosis, glucocorticoid-induced bone loss, multiple myeloma, and rheumatoid arthritis. The discovery of this system has led to recognition of the genetic basis of various skeletal disorders and the development of new therapeutic approaches, including a monoclonal antibody to RANKL for the treatment of postmenopausal osteoporosis.

### Bone Remodeling Cycle

Bone is a dynamic tissue that constantly remodels in response to mechanical stresses and hormonal changes (1).

First Published Online September 25, 2007

Abbreviations: JPD, Juvenile Paget's disease; OPG, osteoprotegerin; PDB2, early-onset Paget's disease of bone; RANK, receptor activator of nuclear factor- $\kappa$ B; RANKL, RANK ligand; sRANKL, soluble RANKL; TRAIL, TNF-related apoptosis-inducing ligand.

JCEM is published monthly by The Endocrine Society (<http://www.endo-society.org>), the foremost professional society serving the endocrine community.

Bone remodeling occurs within discrete units throughout the skeleton called bone remodeling units and involves a dynamic equilibrium between osteoclastic bone resorption and osteoblastic bone formation. Each remodeling cycle begins with the transformation of a quiescent bone surface to a bone resorptive surface (2, 3). Osteocytes are thought to play a principal role in initiating bone remodeling by conveying local signals to osteoblasts and osteoclasts on bone surface via a canalicular system (4–8). The principal function of osteoclasts is to resorb matrix by creating resorption pits (Howship's lacunae) (9). Bone resorption within a given bone remodeling unit ends with apoptosis of the osteoclasts and is followed by coupling signals sent to osteoblasts to appear at the resorption cavities. Osteoblasts then synthesize bone matrix, which mineralizes extracellularly after deposition by osteoblasts.

### Regulatory Mechanisms of Bone Remodeling

Osteoclasts are multinucleated cells originating from granulocyte and macrophage-colony-forming unit hematopoietic stem cells (9). Osteoclastic cell activity is regulated by various cytokines including IL-1, -6, and -11, colony stimulating factors, and calcitropic hormones including PTH, 1,25-dihydroxyvitamin D3, and calcitonin.

Recently, members of the TNF and TNF-receptor super-

family, RANKL, RANK, and OPG, were shown to play a key role in the formation and activation of osteoclasts in conjunction with various cytokines and calciotropic hormones. Experimental studies have demonstrated that RANKL is expressed by osteoblasts and bone marrow stromal cells, whereas its receptor RANK is expressed in preosteoclasts and other cells of this lineage (10) (Fig. 1). The interaction between RANKL and RANK stimulates osteoclastic formation and differentiation (11–14) by activation of several transcription factors that regulate osteoclastogenesis (15, 16). OPG is produced by osteoblasts and acts as a decoy receptor that competes with RANKL for RANK (17, 18). This interaction inhibits osteoclastic proliferation and differentiation and consequently prevents bone resorption (Fig. 1).

### Clinical Conditions Associated with Alterations in the RANK/RANKL/OPG System

The discovery of the RANK/RANKL/OPG system and its interaction with various cytokines and calciotropic hormones in the regulation of osteoclastogenesis have led to further understanding of the pathophysiology of several disorders of mineral metabolism.

#### Postmenopausal osteoporosis

Since discovery of the RANK/RANKL/OPG system as a final pathway in osteoclast formation and differentiation, several investigators have confirmed the key role of this pathway in the pathogenesis of postmenopausal osteoporosis. *In vitro* experiments in human osteoblastic cell lines have shown a dose- and time-dependent increase in OPG mRNA in response to  $17\beta$ -estradiol (19–21). This up-regulation of OPG is expected to decrease the interaction of RANKL with RANK *in vivo* and, consequently, reduce osteoclastic bone resorption. Furthermore, the administration of OPG to ovariectomized rats was shown to prevent bone loss (22). Moreover, in experiments using dual-color flow cytometry, human bone marrow cells from untreated early postmenopausal women exhibited a greater expression of RANKL compared with estrogen-treated postmenopausal women (23). Recent attempts to measure serum levels of RANKL and OPG and correlate these with bone turnover markers and

bone mineral density in postmenopausal women in various populations have yielded mixed results (23–26). These contradictory findings may relate to differences in study design, methodology, or other aspects influencing the measurements of these factors (see below).

#### Glucocorticoid-induced osteoporosis

Glucocorticoid use, a major secondary cause of osteoporosis, alters both osteoblastic bone formation and osteoclastic bone resorption. Recently, the critical role of the RANK/RANKL/OPG system in the pathogenesis of glucocorticoid-induced bone disease has been described. Systemic glucocorticoids can stimulate RANKL expression by osteoblasts and inhibit OPG synthesis with resulting enhancement of osteoclast proliferation and differentiation (27). This interaction may explain the accelerated bone resorption observed early after initiation of glucocorticoid therapy. Clinical studies of patients treated with glucocorticoids for both Crohn's disease and chronic glomerulonephritis demonstrated a significant increase in the serum RANKL/OPG ratio (28, 29). This change correlated with increased levels of urinary and serum markers of bone resorption and with a fall in bone mineral density. Whether glucocorticoid-induced alterations in the RANK/RANKL/OPG system also influence osteoblastic activity remains unclear.

#### Rheumatoid arthritis

Rheumatoid arthritis is a chronic inflammatory condition associated with progressive destruction of the articular synovial lining (30). T cell invasion of the synovium plays a crucial role in the obliteration of the articular cartilage and adjacent bone. Furthermore, fibroblast-like synovial cells have been shown to play a role in this process (30, 31). Until recently, the pathophysiological mechanism of systemic and localized bone loss in rheumatoid arthritis was unclear. It has been demonstrated that T cells express RANKL (32, 33) and that there is overexpression of RANKL mRNA in the synovium of rheumatoid arthritis patients at the site of the bone resorption (34). Elevated serum levels of soluble RANKL and OPG have been demonstrated in patients with rheumatoid

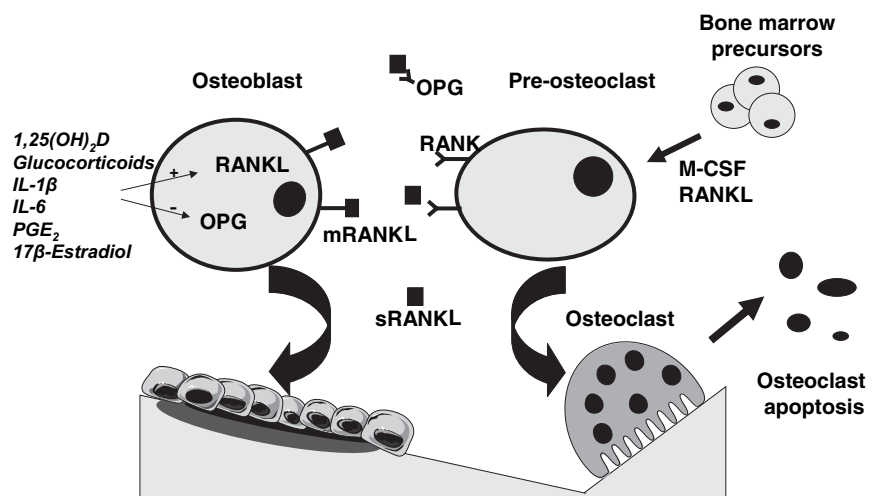

FIG. 1. Regulatory mechanisms of bone remodeling: role of RANK, RANKL, and OPG in osteoclast activation. On the left are shown factors that modulate RANKL/OPG balance: +, stimulatory; -, inhibitory.  $1,25(\text{OH})_2\text{D}$ , 1,25-dihydroxyvitamin D<sub>3</sub>; M-CSF, macrophage-colony stimulating factor; mRANKL, membranous RANKL; PGE<sub>2</sub>, prostaglandin E<sub>2</sub>.

arthritis, and these factors normalize after treatment with anti-TNF therapy (35).

### Multiple myeloma

Multiple myeloma is associated with osteolytic lesions that were initially attributed to an unidentified factor named osteoclastic activating factor (36). Osteoclastic activating factors were shown to be produced by myeloma cells in response to various cytokines including IL-1, IL-6, and TNF- $\alpha$  (37). Recently, an imbalance in the RANK/RANKL/OPG system was suggested as an alternative mechanism for enhanced osteoclastogenesis in bone loss associated with multiple myeloma. Derangements in the RANK/RANKL/OPG system may be due to alterations in RANKL production and/or increased lysosomal degradation of OPG (38). Increased RANKL expression in multiple myeloma may be due to its direct production by myeloma cells or its indirect production through the increased synthesis of IL-7, which then overexpress RANKL in T lymphocytes (38–41).

### Vascular calcification

Atherosclerotic disease is prevalent in the aging population. Several studies have suggested an association between atherosclerosis, vascular calcification, and osteoporosis (42–48). Traditionally, vascular calcification has been considered a passive process involving increased extracellular calcium and phosphorus concentrations. Recently, it has been suggested that this process may be a more active one, similar to that of bone formation (44, 49). This concept is supported by the expression of the osteoblastic transcription factors in calcifying vascular smooth muscle cells (50, 51). An imbalance

in the RANK/RANKL/OPG system has been suggested as responsible for the calcification process of atherosclerotic plaques (45, 52, 53).

Experimental studies have shown the presence of calcified deposits in the aorta and renal arteries in homozygous OPG knockout mice (54). Furthermore, increased expression of RANK and RANKL has been seen in the calcified arteries of this animal model (55). A plausible mechanism is that OPG opposes the activity of the RANK/RANKL system, thereby inhibiting the process of vascular calcification. The rise in serum OPG concentration detected with advanced age may be an adaptive mechanism to control vascular calcification (43).

### Genetic disorders

Discovery of the RANK/RANKL/OPG system has led to recognition of several rare genetic disorders of mineral metabolism (Table 1). Inactivating mutations in the OPG gene (TNFRSF11B) and activating mutations in the RANK gene (TNFRSF11A) have been identified.

*OPG gene.* Mutations in the OPG gene can cause abnormalities in the ligand-binding properties of OPG, resulting in its inactivation and a disorder with diverse phenotypic presentations (55). Juvenile Paget's disease (JPD) is a rare autosomal recessive disorder that presents in early childhood with bone deformities, fractures, hearing deficits, and dental abnormalities of variable severity. The disorder can be due to an inactivating mutation in the OPG gene (TNFRSF11B), localized to chromosome 8q24.2 (56). Missense mutations in the cysteine residues of OPG are predicted to interfere with its

**TABLE 1.** Genetic diseases related to the RANK/RANKL/OPG system

| Diseases                             | Mutations and mode of inheritance                                            | Clinical manifestations                                                                                      | Radiological findings                                                                                                                                                                           |
|--------------------------------------|------------------------------------------------------------------------------|--------------------------------------------------------------------------------------------------------------|-------------------------------------------------------------------------------------------------------------------------------------------------------------------------------------------------|
| JPD                                  | Chromosome 8q24.2<br>Deletion of TNFRSF11B (OPG gene)<br>Autosomal recessive | Failure to thrive<br>Hearing deficit<br><br>Delayed gross motor skills<br>Bone deformities<br>Hypercalciuria | Osteopenia of long bones<br>Coarse bone trabeculae<br><br>Skull involvement                                                                                                                     |
|                                      | PDB2                                                                         | Chromosome 18q21–22<br><br>27-bp insertion mutation in TNFRSF11A (RANK gene)<br>Autosomal dominant           | Dental and hearing defects in young age<br>Characteristic involvement of the mandible and maxilla<br>Pain and deformities of lower limbs and pelvis<br>Transient hypercalcemia (immobilization) |
| Expansile skeletal hyperphosphatasia |                                                                              | Chromosome 18q21–22<br><br>15-bp tandem duplication in TNFRSF11A (RANK gene)<br>Autosomal dominant           | Early deafness<br><br>Premature loss of teeth<br><br>Broad and flattened face<br>Generalized skeletal pain<br>Swelling and deformities, especially in the fingers<br>Episodic hypercalcemia     |
|                                      | Familial expansile osteolysis                                                | Chromosome 18q21.1-q22<br><br>18-bp tandem duplication in TNFRSF11A (RANK gene)<br>Autosomal dominant        | Deafness in childhood<br><br>Dental defects<br><br>Bone pain, deformities, and fractures in limb bones                                                                                          |

ligand-binding domain and are responsible for the most severe phenotype of JPD (55). In more intermediate forms of JPD, missense mutations in residues other than cysteine are present in the ligand-binding region of the OPG. In addition, an insertion-deletion in exon 5 of this gene has been associated with a milder form of the disease. All of these mutations lead to unopposed activation of RANK to varying degrees, resulting in enhanced osteoclastogenesis and consequently increased bone turnover.

**RANK gene.** RANK is encoded by the TNFRSF11A gene located on chromosome 18. Mutations in the RANK gene that disrupt the signal peptide region of the protein result in the lack of normal cleavage of the signal peptide and an increase in RANK-mediated signaling. These activating mutations result in three different phenotypic presentations described below (57).

Early-onset Paget's disease of bone (PDB2) is a heterogeneous, autosomal dominant skeletal disorder characterized by bone deformities, hearing deficits, and dental problems. Skeletal manifestations begin in the late teen years and may progress later in life (58). PDB2 is due to an activating mutation in the RANK gene comprised of a 27-bp tandem duplication.

Expansile skeletal hyperphosphatasia, an autosomal dominant disorder, presents with early onset of deafness, dental defects, and accelerated bone turnover manifested by pain in the bones and episodic hypercalcemia (59). Skeletal symptoms begin before puberty and progress with episodes of exacerbation until middle age. The activating mutation in the RANK gene is caused by a 15-bp tandem duplication (60).

Familial expansile osteolysis is an autosomal dominant disorder that presents in early childhood to young adulthood with hearing deficit. Osteopenia is a common feature and dental abnormalities are uncommon. The major skeletal finding in this disorder is osteolysis followed by bony expansion due to fat deposition rather than osteosclerosis (61). The genetic abnormality is an activating mutation in the RANK gene linked to an 18-bp tandem duplication.

### Assessment of Serum OPG and Soluble RANKL (sRANKL)

Assays for OPG and sRANKL in the circulation in humans have been developed. OPG is a glycoprotein that circulates as a monomer or homodimer and may be bound to RANKL (62). OPG is produced in various tissues including bone, skin, stomach, intestine, lung, heart, and placenta (18). Therefore, serum concentrations of OPG may not accurately reflect its levels in the bone milieu. Commercial ELISA detect all forms of circulating fragments of OPG (63). A PCR technique, an investigative tool, exclusively detects the homodimeric form of OPG (62).

Laboratory measurements of sRANKL are done by assay that is limited by the relative instability of serum RANKL (62, 64, 65). Physiological factors such as cyclic variation, menstrual status, age, and gender must also be considered in interpretation of RANKL assay results.

Several researchers have demonstrated that serum OPG concentrations increase with age in both women and men

(Table 2) (66). OPG levels are higher in osteoporotic women with high bone turnover than in control, nonosteoporotic, age-matched subjects (67–69). However, whether there is an association between serum OPG/sRANKL and incidence of bone fractures has been controversial, with some finding increased and others decreased fractures in association with higher levels of this ratio (70–72). The serum OPG level is affected by its renal clearance and renal function with a higher serum OPG level found in patients on chronic hemodialysis (73). Hormonal changes during pregnancy and lactation may also lower the serum OPG concentration and may be responsible for accelerated bone turnover in these conditions (74, 75). Physiological factors regulating serum RANKL concentrations have not been identified.

In summary, the clinical applications of sRANKL and OPG assays are at present limited due to methodological difficulties, circulating levels that may not reflect tissue levels, and the influences of many physiological factors (e.g. age, ethnicity, gender, renal function, and hormonal status). Although serum OPG and sRANKL determinations may be useful in cross-sectional cohort studies, their reliability in individual patients remains to be established.

## Clinical Implications

### Prostate cancer

OPG is a potential novel indicator for the diagnosis and early progression of prostate cancer (76–78). In one study of 104 patients with either advanced prostate cancer treated with antiandrogen therapy or newly diagnosed prostate cancer, serum OPG levels were higher than in young healthy control subjects (76). Moreover, OPG concentrations were greater in patients with advanced rather than localized disease. Furthermore, patients that responded to antiandrogen treatment, as indicated by a low serum prostate-specific antigen, were found to have significantly lower serum OPG levels. Thus, OPG may be

**TABLE 2.** Determinants of serum OPG and RANKL concentration

| Physiological conditions           | Serum OPG | Serum RANKL |
|------------------------------------|-----------|-------------|
| Age                                | ?         | ?           |
| Pregnancy/lactation                | ?         | ?           |
| Renal function                     | ?         | ?           |
| Disease states/clinical conditions |           |             |
| Postmenopausal osteoporosis        | ? ↓       | ↑ ↓         |
| Rheumatoid arthritis               | ?         | ↑           |
| Multiple myeloma                   | ↓         | ↑           |
| Vascular calcifications            | ?         | ↑           |
| Prostate cancer                    | ?         | ?           |
| Breast cancer                      | ↔         | ?           |
| Renal osteodystrophy               | ? ↓       | ?           |
| Primary biliary cirrhosis          | ?         | ↓           |
| Treatment                          |           |             |
| Glucocorticoids                    | ↓         | ↑           |
| Estrogen                           | ? ↓       | ↓           |
| Aromatase inhibitor                | ?         | ?           |
| Bisphosphonates                    | ↔         | ↔           |

↑, Increase in serum concentration; ↓, decrease in serum concentration; ↑ ↓, unequivocal serum concentration; ↔, no significant change in serum concentration; ?, not well studied.



come a useful marker in the management of patients with advanced prostate cancer.

#### *Multiple myeloma*

Several studies have found lower concentrations of serum OPG in patients with multiple myeloma compared with controls (79–81). Moreover, the serum OPG concentrations in patients with radiographic evidence of multiple myeloma were found to be lower than in those patients without skeletal manifestations (79, 81). Serum OPG levels also correlated with the World Health Organization multiple myeloma performance status, the grading scale of skeletal morbidity in three stages of this illness, and the serum marker of bone formation, carboxyl-terminal propeptide type I procollagen (79). However, serum OPG concentrations have not been found to be associated with clinical stage or survival.

#### *Breast cancer*

OPG production by breast cancer cells is a possible mechanism to enhance tumor cell survival because OPG can inhibit TNF-related apoptosis-inducing ligand (TRAIL)-induced apoptosis (82). In a cross-sectional study, baseline serum OPG concentrations were similar between breast cancer patients with and without bone metastases (83). However, serum OPG levels increased from baseline after a 12-wk treatment with an aromatase inhibitor (anastrozole) only in patients with skeletal involvement. Prospective studies are needed to verify whether there is value in measuring serum OPG concentrations to predict the presence of bone lesions in patients with breast malignancy.

#### *Renal osteodystrophy and renal transplant*

Renal osteodystrophy is a complex group of disorders characterized by either increased or suppressed bone turnover (84, 85). Serum OPG concentrations are lower in patients with adynamic bone disease, which accounts for a large percentage of the skeletal disease in this population, in contrast to those with increased bone turnover due to PTH stimulation (86). It is possible that the increased serum OPG concentrations in patients with chronic kidney disease may be an adaptive mechanism to attenuate PTH-induced bone loss. It is tempting to suggest that the serum OPG concentration may be used as a marker of bone turnover to predict the development of adynamic bone disease, but a major limitation is the decreased renal clearance of OPG in patients with renal impairment (73). Moreover, the significance of serum OPG levels after renal transplantation has not been fully explored. One study showed a rapid decline in serum OPG levels after transplantation, independent of alterations in creatinine clearance. These results suggest that serum OPG changes may have been due to direct effects of immunosuppressive medications on bone remodeling (87). Similar changes were shown in patients after cardiac transplantation, implicating serum OPG as a possible participant in the pathogenesis of bone loss in patients after solid organ transplantation (88).

### **Future Therapeutic Approaches to Bone Diseases**

The discovery of the RANK/RANKL/OPG system has led to exploration of novel therapeutic options for the treatment of skeletal disorders. Although an elevated RANKL/OPG ratio promotes bone loss, restoring a more physiological ratio might reduce osteoclast activation and slow bone resorption. Promising strategies include recombinant OPG and human monoclonal antibody to RANKL.

#### *Multiple myeloma and breast malignancy*

In a phase I, randomized, double-blind trial, the effect of a single sc dose of human monoclonal OPG was tested in 28 patients with multiple myeloma and 26 patients with osteolytic lesions from breast carcinoma (89). The treatment rapidly decreased urinary markers of bone resorption, similar to the bisphosphonate pamidronate. A major limitation in the use of monoclonal OPG is its significantly short half-life, which limits its duration of inhibition of bone resorption to several weeks (90).

The efficacy of a human monoclonal antibody to RANKL (denosumab) compared with pamidronate was examined in a randomized, double-blind, controlled study in patients with multiple myeloma and skeletal metastasis from breast carcinoma (91). A single dose of denosumab decreased urinary and serum markers of bone resorption within 1 d of drug administration. This antiresorptive effect persisted for approximately 3 months in patients who received the highest dosage of denosumab, longer than the changes seen in the group of patients treated with pamidronate. Whether denosumab reduces the occurrence of new skeletal lesions and/or decreases bone pain in patients with multiple myeloma and skeletal metastatic disease from breast carcinoma remains to be determined.

#### *Postmenopausal osteoporosis*

In a double-blind, randomized, placebo-controlled, dose-escalation, phase I trial involving 52 healthy postmenopausal women, OPG administration significantly decreased bone resorption markers (92). The maximal fall in bone resorption markers was 4 d after a single dose of OPG and persisted for 6 wk. Another single-dose, placebo-controlled phase I trial in 49 healthy postmenopausal women determined the safety and reversible antiresorptive effect of human monoclonal antibody to RANKL (denosumab) (93). This agent caused a rapid, sustained, and dose-dependent decrease in urinary N-telopeptide after a single dose.

A phase III, double-blind, randomized, placebo-controlled trial compared the effects of denosumab to open-label oral alendronate in 412 postmenopausal women with osteopenia and osteoporosis (94). Treatment with denosumab for 12 months significantly increased the bone mineral density at the lumbar spine from 3 to 7% in a dose-dependent manner, which was comparable to the 5% increase in lumbar spine bone density in alendronate-treated patients. Bone mineral density at the total hip increased significantly from 2 to 4% comparable to an increase of 2% with alendronate. The efficacy of these drugs against the development of fractures has not yet been explored. Intermittent injections of denosumab

may circumvent the problem of poor compliance with oral bisphosphonates (95).

Two major concerns regarding treatment with human monoclonal antibodies to RANKL and recombinant OPG are the potential development of infections and the possible increased risk of malignancy due to modulation of the immune system (96). One possible mechanism for the development of malignancy is an alteration in TRAIL, which is a potent inhibitor of various tumor cells (97–99). *In vivo*, OPG can act as a decoy receptor for TRAIL and block TRAIL-induced apoptosis. Blockade of RANKL action may increase the effectiveness of OPG to block TRAIL and possibly to increase the growth of tumors. The theoretical basis for the increased propensity for infections with RANKL inhibition stems from the expression of RANK on T, hematopoietic, and dendritic cells (12, 32). Furthermore, the binding of RANKL to RANK may regulate T cell activation as well as dendritic cell function (32, 100). Inhibition of T and B cell function has been observed in RANKL-deficient mice (100). In the single-dose, controlled study of the human monoclonal antibody to RANKL in postmenopausal women, there was no change in lymphocyte counts or in the numbers of B cells, and T cells expressing CD4, CD8, and CD56 (93). In the phase III trial with denosumab, a 2% incidence of neoplasm and a 1% incidence of unspecified infection were noted after 12 months in the denosumab groups, whereas neither problem developed in subjects in the placebo group or the alendronate group. These potential complications as well as antifracture efficacy of therapies targeting the RANK/RANKL/OPG pathway should be evaluated in larger and longer clinical trials.

### Conclusion

The elucidation of the RANK/RANKL/OPG system has vastly increased our understanding of the mechanisms underlying the bone remodeling process. This system plays a central role in the pathophysiological mechanisms underlying postmenopausal osteoporosis, glucocorticoid-induced osteoporosis, rheumatoid arthritis, osteolytic processes involved in multiple myeloma and metastatic breast carcinoma, rare inherited bone disorders, and the development of atherosclerosis. With the discovery of the RANK/RANKL/OPG system, novel therapeutic options for the treatment of skeletal disorders have emerged, including denosumab, the human monoclonal antibody to RANKL.

### Acknowledgments

The authors acknowledge the assistance of Ms. Hadley Armstrong.

Received March 22, 2007. Accepted September 18, 2007.

Address all correspondence and requests for reprints to: Khashayar Sakhaee, M.D., Charles and Jane Pak Center for Mineral Metabolism and Clinical Research and Department of Internal Medicine, University of Texas Southwestern Medical Center, 5323 Harry Hines Boulevard, Dallas, Texas 75390-8885. E-mail: Khashayar.sakhaee@utsouthwestern.edu.

Disclosure Information: The authors have nothing to disclose.

### References

1. ASBMR 2006 Primer on the metabolic bone diseases and disorders of mineral and metabolism. 6th ed. Washington, DC: American Society for Bone and Mineral Research

2. Manolagas SC 2000 Birth and death of bone cells: basic regulatory mechanisms and implications for the pathogenesis and treatment of osteoporosis. *Endocr Rev* 21:115–137
3. Manolagas SC 1999 Cell number *versus* cell vigor: what really matters to a regenerating skeleton? *Endocrinology* 140:4377–4381
4. Qiu S, Rao DS, Palnitkar S, Parfitt AM 2006 Differences in osteocyte and lacunar density between Black and White American women. *Bone* 38:130–135
5. Manolagas SC 2006 Choreography from the tomb: an emerging role of dying osteocytes in the purposeful, and perhaps not so purposeful, targeting of bone remodeling. *BoneKey-OsteoVision* 3:5–14
6. Turner CH, Robling AG, Duncan RL, Burr DB 2002 Do bone cells behave like a neuronal network? *Calcif Tissue Int* 70:435–442
7. Burger EH, Klein-Nulend J, Smit TH 2003 Strain-derived canalicular fluid flow regulates osteoclast activity in a remodelling osteon: a proposal. *J Biomech* 36:1453–1459
8. Huiskes R, Ruimerman R, van Lenthe GH, Janssen JD 2000 Effects of mechanical forces on maintenance and adaptation of form in trabecular bone. *Nature* 405:704–706
9. Suda T, Takahashi N, Martin TJ 1992 Modulation of osteoclast differentiation. *Endocr Rev* 13:66–80
10. Fuller K, Wong B, Fox S, Choi Y, Chambers TJ 1998 TRANCE is necessary and sufficient for osteoblast-mediated activation of bone resorption in osteoclasts. *J Exp Med* 188:997–1001
11. Matsuzaki K, Udagawa N, Takahashi N, Yamaguchi K, Yasuda H, Shima N, Morinaga T, Toyama Y, Yabe Y, Higashio K, Suda T 1998 Osteoclast differentiation factor (ODF) induces osteoclast-like cell formation in human peripheral blood mononuclear cell cultures. *Biochem Biophys Res Commun* 246:199–204
12. Lacey DL, Timms E, Tan HL, Kelley MJ, Dunstan CR, Burgess T, Elliott R, Colombero A, Elliott G, Scully S, Hsu H, Sullivan J, Hawkins N, Davy E, Capparelli C, Eli A, Qian YX, Kaufman S, Sarosi I, Shalhoub V, Senaldi G, Guo J, Delaney J, Boyle WJ 1998 Osteoprotegerin ligand is a cytokine that regulates osteoclast differentiation and activation. *Cell* 93:165–176
13. Jimi E, Akiyama S, Tsurukai T, Okahashi N, Kobayashi K, Udagawa N, Nishihara T, Takahashi N, Suda T 1999 Osteoclast differentiation factor acts as a multifunctional regulator in murine osteoclast differentiation and function. *J Immunol* 163:434–442
14. Burgess TL, Qian Y, Kaufman S, Ring BD, Van G, Capparelli C, Kelley M, Hsu H, Boyle WJ, Dunstan CR, Hu S, Lacey DL 1999 The ligand for osteoprotegerin (OPGL) directly activates mature osteoclasts. *J Cell Biol* 145:527–538
15. Blair JM, Zheng Y, Dunstan CR 2007 RANK ligand. *Int J Biochem Cell Biol* 39:1077–1081
16. Hsu H, Lacey DL, Dunstan CR, Solovyev I, Colombero A, Timms E, Tan HL, Elliott G, Kelley MJ, Sarosi I, Wang L, Xia XZ, Elliott R, Chiu L, Black T, Scully S, Capparelli C, Morony S, Shimamoto G, Bass MB, Boyle WJ 1999 Tumor necrosis factor receptor family member RANK mediates osteoclast differentiation and activation induced by osteoprotegerin ligand. *Proc Natl Acad Sci USA* 96:3540–3545
17. Bolon B, Carter C, Daris M, Morony S, Capparelli C, Hsieh A, Mao M, Kostenuik P, Dunstan CR, Lacey DL, Sheng JZ 2001 Adenoviral delivery of osteoprotegerin ameliorates bone resorption in a mouse ovariectomy model of osteoporosis. *Mol Ther* 3:197–205
18. Simonet WS, Lacey DL, Dunstan CR, Kelley M, Chang MS, Luthy R, Nguyen HQ, Wooden S, Bennett L, Boone T, Shimamoto G, DeRose M, Elliott R, Colombero A, Tan HL, Trail G, Sullivan J, Davy E, Bucay N, Renshaw-Gegg L, Hughes TM, Hill D, Pattison W, Campbell P, Sander S, Van G, Tarpley J, Derby P, Lee R, Boyle WJ 1997 Osteoprotegerin: a novel secreted protein involved in the regulation of bone density. *Cell* 89:309–319
19. Pacifici R 1996 Estrogen, cytokines, and pathogenesis of postmenopausal osteoporosis. *J Bone Miner Res* 11:1043–1051
20. Jilka RL 1998 Cytokines, bone remodeling, and estrogen deficiency: a 1998 update. *Bone* 23:75–81
21. Manolagas SC, Jilka RL 1995 Bone marrow, cytokines, and bone remodeling. Emerging insights into the pathophysiology of osteoporosis. *N Engl J Med* 332:305–311
22. Hofbauer LC, Khosla S, Dunstan CR, Lacey DL, Spelsberg TC, Riggs BL 1999 Estrogen stimulates gene expression and protein production of osteoprotegerin in human osteoblastic cells. *Endocrinology* 140:4367–4370
23. Eghbali-Fatourehchi G, Khosla S, Sanyal A, Boyle WJ, Lacey DL, Riggs BL 2003 Role of RANK ligand in mediating increased bone resorption in early postmenopausal women. *J Clin Invest* 111:1221–1230
24. Liu JM, Zhao HY, Ning G, Zhao YJ, Chen Y, Zhang Z, Sun LH, Xu MY, Chen JL 2005 Relationships between the changes of serum levels of OPG and RANKL with age, menopause, bone biochemical markers and bone mineral density in Chinese women aged 20–75. *Calcif Tissue Int* 76:1–6
25. Han KO, Choi JT, Choi HA, Moon IG, Yim CH, Park WK, Yoon HK, Han IK 2005 The changes in circulating osteoprotegerin after hormone therapy in postmenopausal women and their relationship with oestrogen responsiveness on bone. *Clin Endocrinol (Oxf)* 62:349–353
26. Rogers A, Saleh G, Hannon RA, Greenfield D, Eastell R 2002 Circulating

- estradiol and osteoprotegerin as determinants of bone turnover and bone density in postmenopausal women. *J Clin Endocrinol Metab* 87:4470–4475
27. Hofbauer LC, Gori F, Riggs BL, Lacey DL, Dunstan CR, Spelsberg TC, Khosla S 1999 Stimulation of osteoprotegerin ligand and inhibition of osteoprotegerin production by glucocorticoids in human osteoblastic lineage cells: potential paracrine mechanisms of glucocorticoid-induced osteoporosis. *Endocrinology* 140:4382–4389
  28. Sasaki N, Kusano E, Ando Y, Nemoto J, Iimura O, Ito C, Takeda S, Yano K, Tsuda E, Asano Y 2002 Changes in osteoprotegerin and markers of bone metabolism during glucocorticoid treatment in patients with chronic glomerulonephritis. *Bone* 30:853–858
  29. von Tirpitz C, Epp S, Klaus J, Mason R, Hawa G, Brinskelle-Schmal N, Hofbauer LC, Adler G, Kratzer W, Reinshagen M 2003 Effect of systemic glucocorticoid therapy on bone metabolism and the osteoprotegerin system in patients with active Crohn's disease. *Eur J Gastroenterol Hepatol* 15:1165–1170
  30. Abeles AM, Pillinger MH 2006 The role of the synovial fibroblast in rheumatoid arthritis: cartilage destruction and the regulation of matrix metalloproteinases. *Bull NYU Hosp Jt Dis* 64:20–24
  31. Mor A, Abramson SB, Pillinger MH 2005 The fibroblast-like synovial cell in rheumatoid arthritis: a key player in inflammation and joint destruction. *Clin Immunol* 115:118–128
  32. Anderson DM, Maraskovsky E, Billingsley WL, Dougall WC, Tometsko ME, Roux ER, Teepe MC, DuBoise RF, Cosman D, Galibert L 1997 A homologue of the TNF receptor and its ligand enhance T-cell growth and dendritic-cell function. *Nature* 390:175–179
  33. Wong BR, Rho J, Arron J, Robinson E, Orlinick J, Chao M, Kalachikov S, Cayani E, Bartlett 3rd FS, Frankel WN, Lee SY, Choi Y 1997 TRANCE is a novel ligand of the tumor necrosis factor receptor family that activates c-Jun N-terminal kinase in T cells. *J Biol Chem* 272:25190–25194
  34. Shigeyama Y, Pap T, Kunzler P, Simmen BR, Gay RE, Gay S 2000 Expression of osteoclast differentiation factor in rheumatoid arthritis. *Arthritis Rheum* 43:2523–2530
  35. Ziolkowska M, Kurowska M, Radzikowska A, Luszczykiewicz G, Wiland P, Dzwiczopolski W, Filipowicz-Sosnowska A, Pazdur J, Szechinski J, Kowalczewski J, Rell-Bakalari M, Maslinski W 2002 High levels of osteoprotegerin and soluble receptor activator of nuclear factor  $\kappa$ B ligand in serum of rheumatoid arthritis patients and their normalization after anti-tumor necrosis factor  $\alpha$  treatment. *Arthritis Rheum* 46:1744–1753
  36. Mundy GR, Raisz LG, Cooper RA, Schechter GP, Salmon SE 1974 Evidence for the secretion of an osteoclast stimulating factor in myeloma. *N Engl J Med* 291:1041–1046
  37. Farrugia AN, Atkins GJ, To LB, Pan B, Horvath N, Kostakis P, Findlay DM, Barty P, Zannettino AC 2003 Receptor activator of nuclear factor- $\kappa$ B ligand expression by human myeloma cells mediates osteoclast formation in vitro and correlates with bone destruction in vivo. *Cancer Res* 63:5438–5445
  38. Pearce RN, Sordillo EM, Yacoby S, Wong BR, Liao DF, Colman N, Michaeli J, Epstein J, Choi Y 2001 Multiple myeloma disrupts the TRANCE/osteoprotegerin cytokine axis to trigger bone destruction and promote tumor progression. *Proc Natl Acad Sci USA* 98:11581–11586
  39. Sezer O, Heider U, Jakob C, Zavrski I, Eucker J, Possinger K, Sers C, Krenn V 2002 Immunocytochemistry reveals RANKL expression of myeloma cells. *Blood* 99:4646–4647; author reply 4647
  40. Giuliani N, Bataille R, Mancini C, Lazzaretti M, Barille S 2001 Myeloma cells induce imbalance in the osteoprotegerin/osteoprotegerin ligand system in the human bone marrow environment. *Blood* 98:3527–3533
  41. Giuliani N, Colla S, Sala R, Moroni M, Lazzaretti M, La Monica S, Bonomini S, Hojden M, Sammarelli G, Barille S, Bataille R, Rizzoli V 2002 Human myeloma cells stimulate the receptor activator of nuclear factor- $\kappa$ B ligand (RANKL) in T lymphocytes: a potential role in multiple myeloma bone disease. *Blood* 100:4615–4621
  42. Tanko LB, Bagger YZ, Christiansen C 2003 Low bone mineral density in the hip as a marker of advanced atherosclerosis in elderly women. *Calcif Tissue Int* 73:15–20
  43. Tintut Y, Demer L 2006 Role of osteoprotegerin and its ligands and competing receptors in atherosclerotic calcification. *J Investig Med* 54:395–401
  44. Hofbauer LC, Brueck CC, Shanahan CM, Schoppet M, Dobnig H 2007 Vascular calcification and osteoporosis—from clinical observation towards molecular understanding. *Osteoporos Int* 18:251–259
  45. Schoppet M, Al-Fakhri N, Franke FE, Katz N, Barth PJ, Maisch B, Preissner KT, Hofbauer LC 2004 Localization of osteoprotegerin, tumor necrosis factor-related apoptosis-inducing ligand, and receptor activator of nuclear factor- $\kappa$ B ligand in Monckeberg's sclerosis and atherosclerosis. *J Clin Endocrinol Metab* 89:4104–4112
  46. Pennisi P, Signorelli SS, Riccobene S, Celotta G, Di Pino L, La Malfa T, Fiore CE 2004 Low bone density and abnormal bone turnover in patients with atherosclerosis of peripheral vessels. *Osteoporos Int* 15:389–395
  47. Kiel DP, Kauppila LI, Cupples LA, Hannan MT, O'Donnell CJ, Wilson PW 2001 Bone loss and the progression of abdominal aortic calcification over a 25 year period: the Framingham Heart Study. *Calcif Tissue Int* 68:271–276
  48. Uyama O, Yoshimoto Y, Yamamoto Y, Kawai A 1997 Bone changes and carotid atherosclerosis in postmenopausal women. *Stroke* 28:1730–1732
  49. Doherty TM, Fitzpatrick LA, Inoue D, Qiao JH, Fishbein MC, Detrano RC, Shah PK, Rajavashisth TB 2004 Molecular, endocrine, and genetic mechanisms of arterial calcification. *Endocr Rev* 25:629–672
  50. Abedin M, Tintut Y, Demer LL 2004 Vascular calcification: mechanisms and clinical ramifications. *Arterioscler Thromb Vasc Biol* 24:1161–1170
  51. Tintut Y, Alfonso Z, Saini T, Radcliff K, Watson K, Bostrom K, Demer LL 2003 Multilineage potential of cells from the artery wall. *Circulation* 108:2505–2510
  52. Dhore CR, Cleutjens JP, Lutgens E, Cleutjens KB, Geusens PP, Kitslaar PJ, Tordoir JH, Spronk HM, Vermeer C, Daemen MJ 2001 Differential expression of bone matrix regulatory proteins in human atherosclerotic plaques. *Arterioscler Thromb Vasc Biol* 21:1998–2003
  53. Kaden JJ, Bickelhaupt S, Grobholz R, Haase KK, Sarikoc A, Kilic R, Brueckmann M, Lang S, Zahn I, Vahl C, Hagl S, Dempfle CE, Borggreve M 2004 Receptor activator of nuclear factor  $\kappa$ B ligand and osteoprotegerin regulate aortic valve calcification. *J Mol Cell Cardiol* 36:57–66
  54. Min H, Morony S, Sarosi I, Dunstan CR, Capparelli C, Scully S, Van G, Kaufman S, Kostenuik PJ, Lacey DL, Boyle WJ, Simonet WS 2000 Osteoprotegerin reverses osteoporosis by inhibiting endosteal osteoclasts and prevents vascular calcification by blocking a process resembling osteoclastogenesis. *J Exp Med* 192:463–474
  55. McKusick VA 2007 Tumor necrosis factor receptor superfamily, member 11B; TNFRSF11B. In: *Online Mendelian inheritance in man*. Baltimore, MD: Johns Hopkins University
  56. Whyte MP, Obrecht SE, Finnegan PM, Jones JL, Podgornik MN, McAlister WH, Mumm S 2002 Osteoprotegerin deficiency and juvenile Paget's disease. *N Engl J Med* 347:175–184
  57. Hughes AE, Ralston SH, Marken J, Bell C, MacPherson H, Wallace RG, van Hul W, Whyte MP, Nakatsuka K, Hovy L, Anderson DM 2000 Mutations in TNFRSF11A, affecting the signal peptide of RANK, cause familial expansile osteolysis. *Nat Genet* 24:45–48
  58. Nakatsuka K, Nishizawa Y, Ralston SH 2003 Phenotypic characterization of early onset Paget's disease of bone caused by a 27-bp duplication in the TNFRSF11A gene. *J Bone Miner Res* 18:1381–1385
  59. Whyte MP, Mills BG, Reinus WR, Podgornik MN, Roodman GD, Gannon FH, Eddy MC, McAlister WH 2000 Expansile skeletal hyperphosphatasia: a new familial metabolic bone disease. *J Bone Miner Res* 15:2330–2344
  60. Whyte MP, Hughes AE 2002 Expansile skeletal hyperphosphatasia is caused by a 15-base pair tandem duplication in TNFRSF11A encoding RANK and is allelic to familial expansile osteolysis. *J Bone Miner Res* 17:26–29
  61. Whyte MP, Reinus WR, Podgornik MN, Mills BG 2002 Familial expansile osteolysis (excessive RANK effect) in a 5-generation American kindred. *Medicine (Baltimore)* 81:101–121
  62. Furuya D, Kaneko R, Yagihashi A, Endoh T, Yajima T, Kobayashi D, Yano K, Tsuda E, Watanabe N 2001 Immuno-PCR assay for homodimeric osteoprotegerin. *Clin Chem* 47:1475–1477
  63. Rogers A, Eastell R 2005 Circulating osteoprotegerin and receptor activator for nuclear factor  $\kappa$ B ligand: clinical utility in metabolic bone disease assessment. *J Clin Endocrinol Metab* 90:6323–6331
  64. Hannon R, Eastell R 2000 Preanalytical variability of biochemical markers of bone turnover. *Osteoporos Int* 11(Suppl 6):S30–S44
  65. Hawa G, Brinskelle-Schmal N, Glatz K, Maitzen S, Woloszczuk W 2003 Immunoassay for soluble RANKL (receptor activator of NF- $\kappa$ B ligand) in serum. *Clin Lab* 49:461–463
  66. Kudlacek S, Schneider B, Woloszczuk W, Pietschmann P, Willvonseder R 2003 Serum levels of osteoprotegerin increase with age in a healthy adult population. *Bone* 32:681–686
  67. Grigorie D, Neacsu E, Marinescu M, Popa O 2003 Circulating osteoprotegerin and leptin levels in postmenopausal women with and without osteoporosis. *Rom J Intern Med* 41:409–415
  68. Riggs BL, Khosla S, Atkinson EJ, Dunstan CR, Melton 3rd LJ 2003 Evidence that type I osteoporosis results from enhanced responsiveness of bone to estrogen deficiency. *Osteoporos Int* 14:728–733
  69. Yano K, Shibata O, Mizuno A, Kobayashi F, Higashio K, Morinaga T, Tsuda E 2001 Immunological study on circulating murine osteoprotegerin/osteoclastogenesis inhibitory factor (OPG/OCIF): possible role of OPG/OCIF in the prevention of osteoporosis in pregnancy. *Biochem Biophys Res Commun* 288:217–224
  70. Jorgensen HL, Kusk P, Madsen B, Fenger M, Lauritzen JB 2004 Serum osteoprotegerin (OPG) and the A163G polymorphism in the OPG promoter region are related to peripheral measures of bone mass and fracture odds ratios. *J Bone Miner Metab* 22:132–138
  71. Browner WS, Lui LY, Cummings SR 2001 Associations of serum osteoprotegerin levels with diabetes, stroke, bone density, fractures, and mortality in elderly women. *J Clin Endocrinol Metab* 86:631–637
  72. Schett G, Kiechl S, Redlich K, Oberhollenzer F, Weger S, Egger G, Mayr A, Jocher J, Xu Q, Pietschmann P, Teitelbaum S, Smolen J, Willeit J 2004 Soluble RANKL and risk of nontraumatic fracture. *JAMA* 291:1108–1113
  73. Kazama JJ, Shigematsu T, Yano K, Tsuda E, Miura M, Iwasaki Y, Kawaguchi Y, Gejyo F, Kurokawa K, Fukagawa M 2002 Increased circulating levels of osteoclastogenesis inhibitory factor (osteoprotegerin) in patients with chronic renal failure. *Am J Kidney Dis* 39:525–532



74. Uemura H, Yasui T, Kiyokawa M, Kuwahara A, Ikawa H, Matsuzaki T, Maegawa M, Furumoto H, Irahara M 2002 Serum osteoprotegerin/osteoclastogenesis-inhibitory factor during pregnancy and lactation and the relationship with calcium-regulating hormones and bone turnover markers. *J Endocrinol* 174:353–359
75. Naylor KE, Rogers A, Fraser RB, Hall V, Eastell R, Blumsohn A 2003 Serum osteoprotegerin as a determinant of bone metabolism in a longitudinal study of human pregnancy and lactation. *J Clin Endocrinol Metab* 88:5361–5365
76. Eaton CL, Wells JM, Holen I, Croucher PI, Hamdy FC 2004 Serum osteoprotegerin (OPG) levels are associated with disease progression and response to androgen ablation in patients with prostate cancer. *Prostate* 59:304–310
77. Brown JM, Vessella RL, Kostenuik PJ, Dunstan CR, Lange PH, Corey E 2001 Serum osteoprotegerin levels are increased in patients with advanced prostate cancer. *Clin Cancer Res* 7:2977–2983
78. Jung K, Stephan C, Semjonow A, Lein M, Schnorr D, Loening SA 2003 Serum osteoprotegerin and receptor activator of nuclear factor- $\kappa$ B ligand as indicators of disturbed osteoclastogenesis in patients with prostate cancer. *J Urol* 170:2302–2305
79. Seidel C, Hjertner O, Abildgaard N, Heickendorff L, Hjorth M, Westin J, Nielsen JL, Hjorth-Hansen H, Waage A, Sundan A, Borsset M 2001 Serum osteoprotegerin levels are reduced in patients with multiple myeloma with lytic bone disease. *Blood* 98:2269–2271
80. Standal T, Seidel C, Hjertner O, Plesner T, Sanderson RD, Waage A, Borsset M, Sundan A 2002 Osteoprotegerin is bound, internalized, and degraded by multiple myeloma cells. *Blood* 100:3002–3007
81. Lipton A, Ali SM, Leitzel K, Chinchilli V, Witters L, Engle L, Holloway D, Bekker P, Dunstan CR 2002 Serum osteoprotegerin levels in healthy controls and cancer patients. *Clin Cancer Res* 8:2306–2310
82. Holen I, Cross SS, Neville-Webbe HL, Cross NA, Balasubramanian SP, Croucher PI, Evans CA, Lippitt JM, Coleman RE, Eaton CL 2005 Osteoprotegerin (OPG) expression by breast cancer cells in vitro and breast tumours in vivo: a role in tumour cell survival? *Breast Cancer Res Treat* 92:207–215
83. Martinetti A, Bajetta E, Ferrari L, Zilembo N, Seregni E, Del Vecchio M, Longarini R, La Torre I, Toffolatti L, Paleari D, Bombardieri E 2004 Osteoprotegerin and osteopontin serum values in postmenopausal advanced breast cancer patients treated with anastrozole. *Endocr Relat Cancer* 11:771–779
84. Sherrard DJ, Hercz G, Pei Y, Maloney NA, Greenwood C, Manuel A, Saiphoo C, Fenton SS, Segre GV 1993 The spectrum of bone disease in end-stage renal failure: an evolving disorder. *Kidney Int* 43:436–442
85. Akizawa T, Kinugasa E, Akiba T, Tsukamoto Y, Kurokawa K 1997 Incidence and clinical characteristics of hypoparathyroidism in dialysis patients. *Kidney Int Suppl* 62:S72–S74
86. Coen G, Ballanti P, Balducci A, Calabria S, Fischer MS, Jankovic L, Manni M, Morosetti M, Moscaritolo E, Sardella D, Bonucci E 2002 Serum osteoprotegerin and renal osteodystrophy. *Nephrol Dial Transplant* 17:233–238
87. Sato T, Tominaga Y, Iwasaki Y, Kazama JJ, Shigematsu T, Inagaki H, Watanabe I, Katayama A, Haba T, Uchida K, Fukagawa M 2001 Osteoprotegerin levels before and after renal transplantation. *Am J Kidney Dis* 38: S175–S177
88. Fahrleitner A, Prener G, Leb G, Tscheliessnigg KH, Piswanger-Solkner C, Obermayer-Pietsch B, Portugaller HR, Berghold A, Dobnig H 2003 Serum osteoprotegerin is a major determinant of bone density development and prevalent vertebral fracture status following cardiac transplantation. *Bone* 32:96–106
89. Body JJ, Greipp P, Coleman RE, Facon T, Geurs F, Femand JP, Harousseau JL, Lipton A, Mariette X, Williams CD, Nakanishi A, Holloway D, Martin SW, Dunstan CR, Bekker PJ 2003 A phase I study of AMG-0007, a recombinant osteoprotegerin construct, in patients with multiple myeloma or breast carcinoma related bone metastases. *Cancer* 97:887–892
90. Kostenuik PJ 2005 Osteoprotegerin and RANKL regulate bone resorption, density, geometry and strength. *Curr Opin Pharmacol* 5:618–625
91. Body JJ, Facon T, Coleman RE, Lipton A, Geurs F, Fan M, Holloway D, Peterson MC, Bekker PJ 2006 A study of the biological receptor activator of nuclear factor- $\kappa$ B ligand inhibitor, denosumab, in patients with multiple myeloma or bone metastases from breast cancer. *Clin Cancer Res* 12:1221–1228
92. Bekker PJ, Holloway D, Nakanishi A, Arrighi M, Leese PT, Dunstan CR 2001 The effect of a single dose of osteoprotegerin in postmenopausal women. *J Bone Miner Res* 16:348–360
93. Bekker PJ, Holloway DL, Rasmussen AS, Murphy R, Martin SW, Leese PT, Holmes GB, Dunstan CR, DePaoli AM 2004 A single-dose placebo-controlled study of AMG 162, a fully human monoclonal antibody to RANKL, in postmenopausal women. *J Bone Miner Res* 19:1059–1066
94. McClung MR, Lewiecki EM, Cohen SB, Bolognese MA, Woodson GC, Moffett AH, Peacock M, Miller PD, Lederman SN, Chesnut CH, Lain D, Kivitz AJ, Holloway DL, Zhang C, Peterson MC, Bekker PJ 2006 Denosumab in postmenopausal women with low bone mineral density. *N Engl J Med* 354:821–831
95. Black DM, Delmas PD, Eastell R, Reid IR, Boonen S, Cauley JA, Cosman F, Lakatos P, Leung PC, Man Z, Mautalen C, Mesenbrink P, Hu H, Caminis J, Tong K, Rosario-Jansen T, Krasnow J, Hue TF, Sellmeyer D, Eriksen EF, Cummings SR 2007 Once-yearly zoledronic acid for treatment of postmenopausal osteoporosis. *N Engl J Med* 356:1809–1822
96. Whyte MP 2006 The long and the short of bone therapy. *N Engl J Med* 354:860–863
97. Cross SS, Harrison RF, Balasubramanian SP, Lippitt JM, Evans CA, Reed MW, Holen I 2006 Expression of receptor activator of nuclear factor  $\gamma$ B ligand (RANKL) and tumour necrosis factor related, apoptosis inducing ligand (TRAIL) in breast cancer, and their relations with osteoprotegerin, oestrogen receptor, and clinicopathological variables. *J Clin Pathol* 59:716–720
98. Holen I, Croucher PI, Hamdy FC, Eaton CL 2002 Osteoprotegerin (OPG) is a survival factor for human prostate cancer cells. *Cancer Res* 62:1619–1623
99. Neville-Webbe HL, Cross NA, Eaton CL, Nyambo R, Evans CA, Coleman RE, Holen I 2004 Osteoprotegerin (OPG) produced by bone marrow stromal cells protects breast cancer cells from TRAIL-induced apoptosis. *Breast Cancer Res Treat* 86:269–279
100. Kong YY, Yoshida H, Sarosi I, Tan HL, Timms E, Capparelli C, Morony S, Oliveira-dos-Santos AJ, Van G, Itie A, Khoo W, Wakeham A, Dunstan CR, Lacey DL, Mak TW, Boyle WJ, Penninger JM 1999 OPGL is a key regulator of osteoclastogenesis, lymphocyte development and lymph-node organogenesis. *Nature* 397:315–323

JCEM is published monthly by The Endocrine Society (<http://www.endo-society.org>), the foremost professional society serving the endocrine community.
